# Supplementary material for: Unraveling the caspase-mediated mechanism for phloroglucinol-encapsulated starch biopolymer against the breast cancer cell line MDA-MB-231
Source: Royal Society of Chemistry journal article supplement (doi:10.1039/c4ra06664b), 2014-01-01
Supplement: c4ra06664b1.pdf [file c4ra06664b1.pdf]

List of Supplementary Tables.

Supplementary Table. 1 Primers used

| Gene name        |           | Primer                            |
|------------------|-----------|-----------------------------------|
| <b>β-actin</b>   | Sense     | 5'-ACGGGGTCACCCACACTGTGC-3'       |
|                  | Antisense | 5'-CTAGAAGCATTGCGGTGGTGGACGATG-3' |
| <b>Caspase-3</b> | Sense     | 5'-CAGTGTTCTCCATGGATACCTTTATT-3'  |
|                  | Antisense | 5'-CTGGTTTTCGGTGGGTGT-3'          |
| <b>Caspase-8</b> | Sense     | 5'-ACAATGCCCAGATTTCTCCCTAC-3'     |
|                  | Antisense | 5'-CAGACAGTATCCCCGAG'GTTTG-3'     |
| <b>Caspase-9</b> | Sense     | 5'-TTCCCAGGTTTTGTTTCCTG-3         |
|                  | Antisense | 5'-CCTTTCACCGAAACAGCATT-3         |

**Supplementary Table. 2** Cell cycle analysis

| <b>Phase of cell<br/>cycle</b> | <b>Cell cycle analysis</b> |                     |                     |
|--------------------------------|----------------------------|---------------------|---------------------|
|                                | <b>Control</b>             | <b>24 h treated</b> | <b>48 h treated</b> |
| <b>Sub-G1</b>                  | 0.06 %                     | 8.98 %              | 2.89 %              |
| <b>G1 phase</b>                | 84.92 %                    | 71.26 %             | 77.77 %             |
| <b>S phase</b>                 | 1.79 %                     | 7.63 %              | 3.82 %              |
| <b>G2 phase</b>                | 6.73 %                     | 2.52 %              | 7.55 %              |
